# Supplementary material for: Photoluminescent graphene quantum dots for in vivo imaging of apoptotic cells
Source: Royal Society of Chemistry journal article supplement (doi:10.1039/c4nr07005d), 2014-12-16
Supplement: c4nr07005d1.pdf [file c4nr07005d1.pdf]

## *Supporting Information*

### **Photoluminescent Graphene Quantum Dots for *in vivo* Imaging of Apoptotic Cells**

*Prathik Roy,<sup>a</sup> Arun Prakash Periasamy,<sup>a</sup> Chiu-Ya Lin,<sup>b</sup> Guor-Mour Her,<sup>b</sup> Wei-Jane*

*Chiu,<sup>b</sup> Chi-Lin Li,<sup>a</sup> Chia-Lun Shu,<sup>a</sup> Chih-Ching Huang,<sup>b\*</sup> Chi-Te Liang,<sup>c,d</sup> and Huan-*

*Tsung Chang<sup>a\*</sup>*

*<sup>a</sup>Department of Chemistry, National Taiwan University, Taipei, Taiwan; <sup>b</sup>Department of Bioscience and Biotechnology, National Taiwan Ocean University, Keelung, Taiwan; <sup>c</sup>Department of Physics, National Taiwan University, Taipei, Taiwan; <sup>d</sup>Geballe Laboratory for Advanced Materials (GLAM), Stanford University, Stanford, CA 94305, USA;*

E-mail: [changht@ntu.edu.tw](mailto:changht@ntu.edu.tw)

**Correspondence:** Professor Huan-Tsung Chang, Department of Chemistry, National Taiwan University, 1, Section 4, Roosevelt Road, Taipei 10617, Taiwan; Tel. and fax: 011-886-2-3366-1171; e-mail: [changht@ntu.edu.tw](mailto:changht@ntu.edu.tw)

Professor Chih-Ching Huang, Institute of Bioscience and Biotechnology, National Taiwan Ocean University, 2, Pei-Ning Road, Keelung 20224, Taiwan. Tel.: 011-886-2-2462-2192 ext. 5517; E-mail: [huangcing@ntou.edu.tw](mailto:huangcing@ntou.edu.tw).

**Quantum Yield equation:**

$$\Phi = \Phi_R \frac{I}{I_R} \frac{E_R n^2}{E n_R^2},$$

where  $\Phi$  denotes quantum yield,  $I$  is integrated fluorescence intensity,  $E$  is extinction co-efficient,  $n$ = refractive index and the index  $R$  indicates the standard.

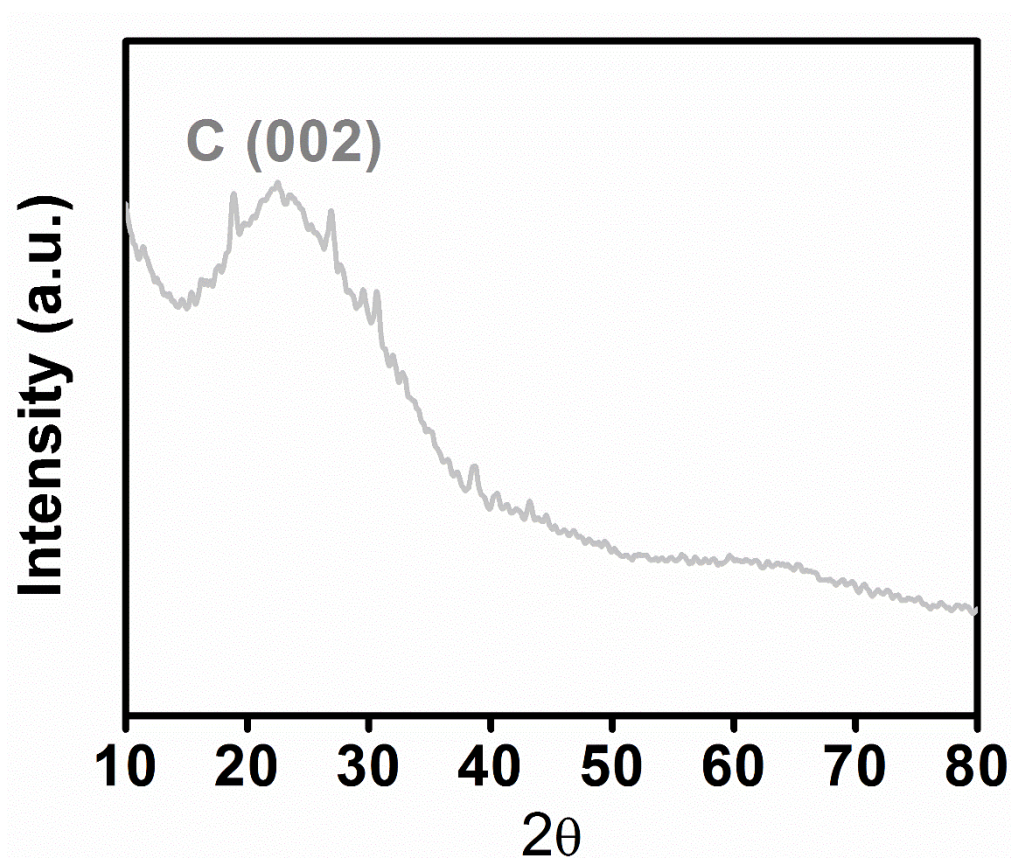

**Figure S1.** XRD spectrum of the as-prepared GQDs.

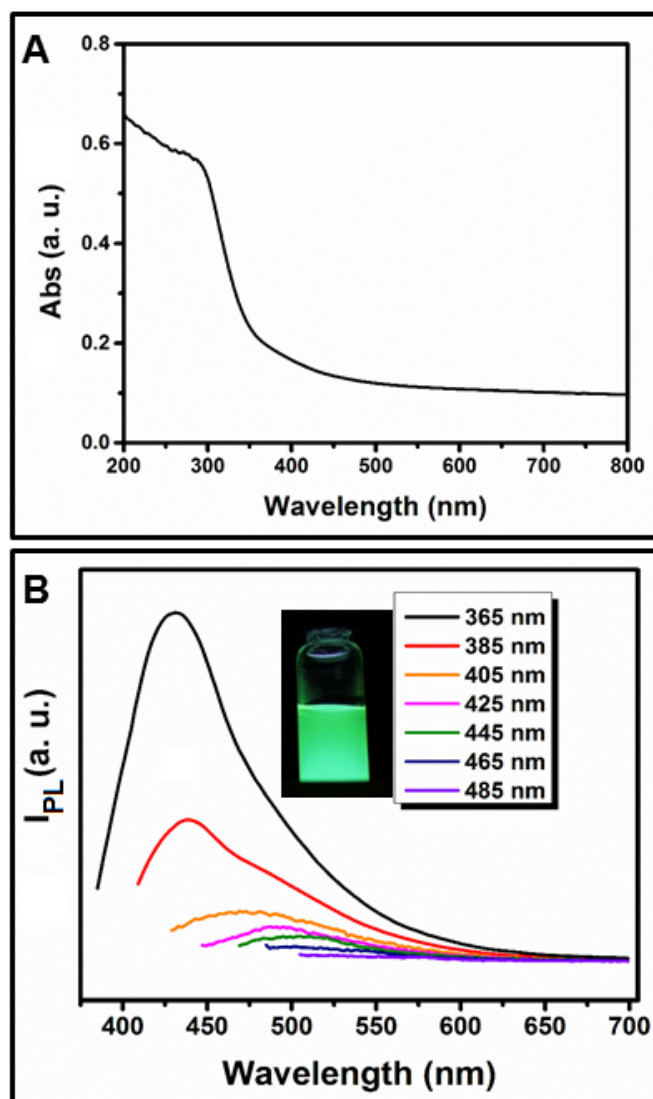

**Figure S2.** (A) UV-visible absorption spectrum and (B) excitation dependent emission spectra (from 365 to 485 nm) of GQDs ( $2 \text{ mg mL}^{-1}$ ) prepared in DI water. Inset: Photograph of photoluminescent GQD solution (excited at 365-nm). Absorbance ( $Abs$ ) in (A) and PL intensity ( $I_{PL}$ ) are plotted in arbitrary units (a. u.).

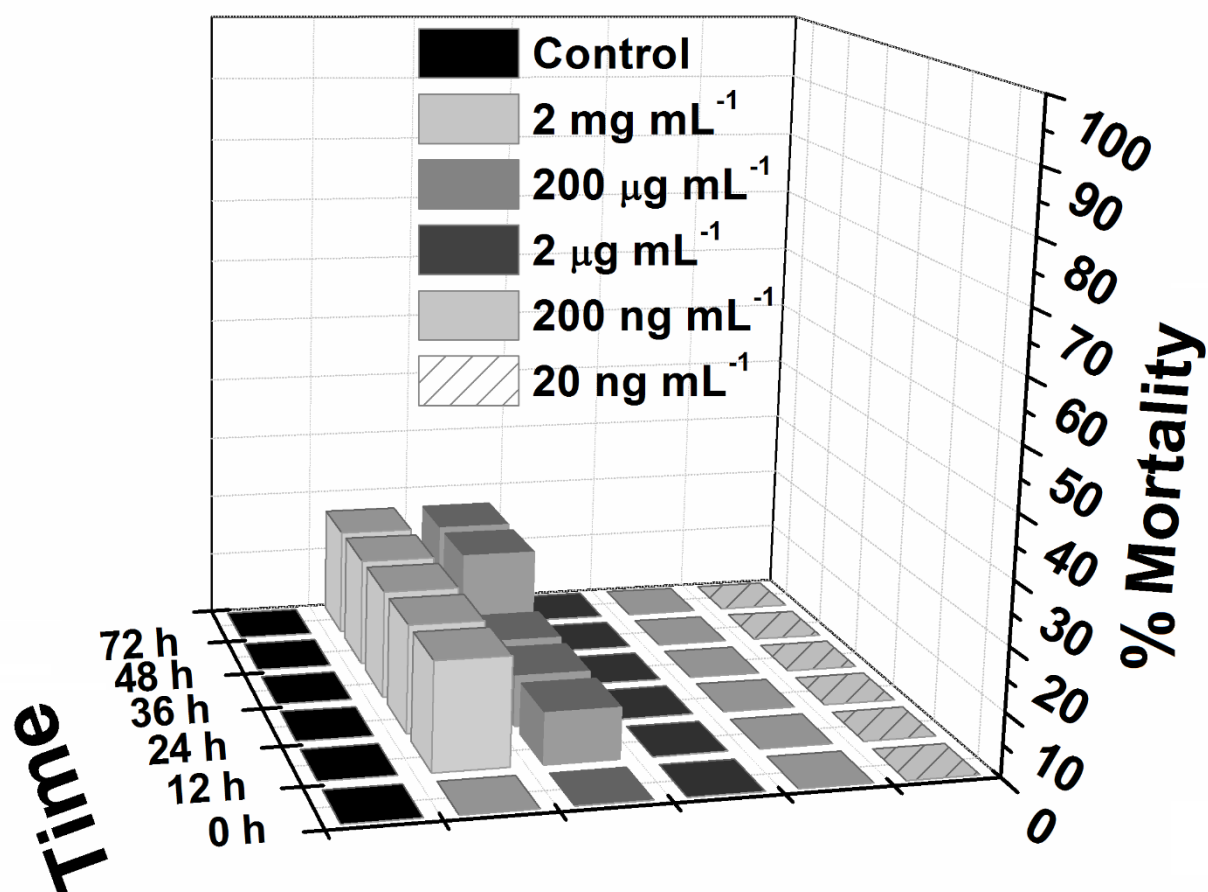

**Figure S3.** Mortality ( $n = 12$ , three replicates, where  $n$  is the number of embryos) of zebrafish embryos exposed in GQD solutions ( $20 \text{ ng mL}^{-1} - 2 \text{ mg mL}^{-1}$ ) in the period of 0–72 h.

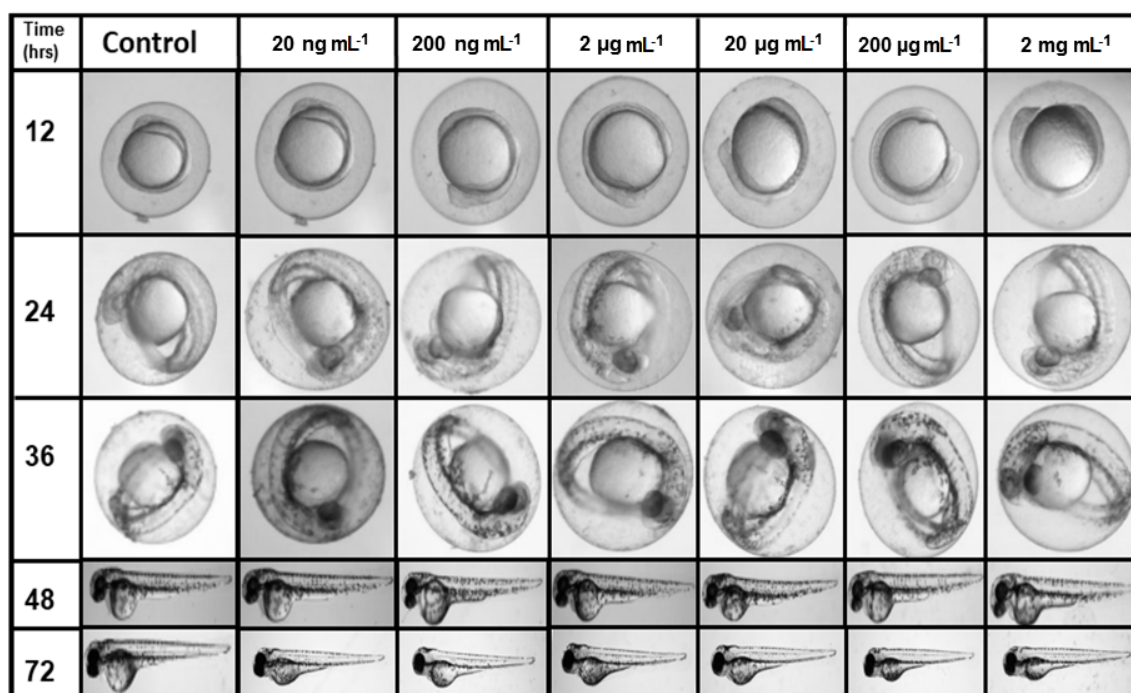

**Figure S4.** Time course recording of morphology of zebrafish embryos exposed in GQD solutions (0–2 mg mL<sup>-1</sup>) in the period of 0–72 h.

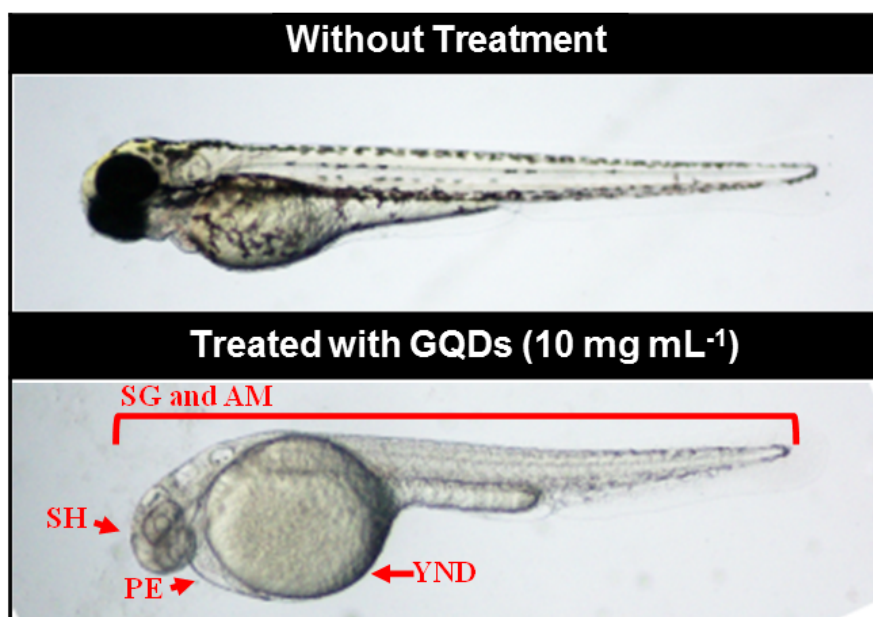

**Figure S5.** Morphologies of zebrafish without (up row) and with (bottom row) treatment with GQD solutions (10 mg mL<sup>-1</sup>) for 120 hpf.

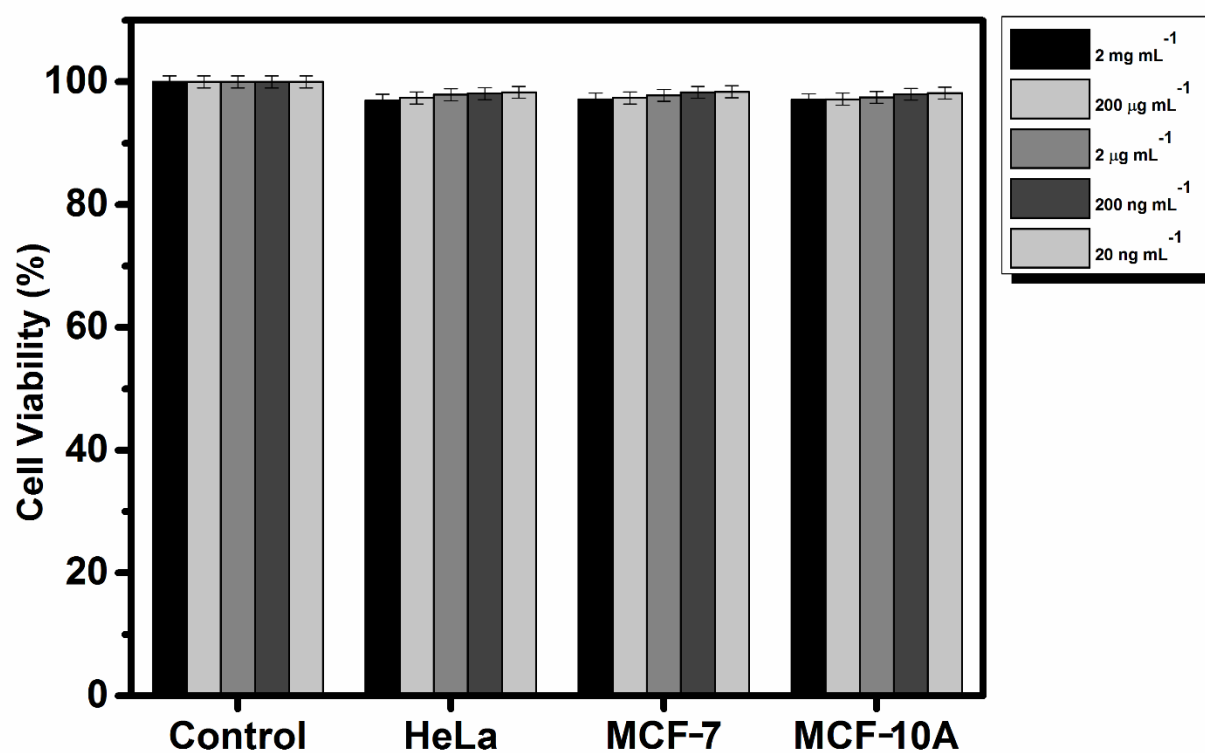

**Figure S6.** Cell viability of HeLa, MCF-7 and MCF-10A cells after GQDs (20 ng mL<sup>-1</sup>–2 mg mL<sup>-1</sup>) treatment for 4 h. The results are the mean  $\pm$  SD of three repeated experiments.
